# Supplementary material for: MAGNETO: An Automated Workflow for Genome-Resolved Metagenomics
Source: PubMed Central journal article supplement (PMC9426564; doi:10.1128/msystems.00432-22), 2022-06-15
Supplement: msystems.00432-22-s0010.pdf [file msystems.00432-22-s0010.pdf]

## SUPPLEMENTARY MATERIAL

**Supplementary Methods** The construction of the Fig. 1B panel implied a global de-replication of the TARA Oceans MAGs, performed by combining sets of MAGs reconstructed with both approaches using dRep as described in the methods section. Once this global de-replication was performed, the total number of de-replicated MAGs (dMAGs) related to one approach is thus:

$$N_{i,r} = n_{i,r} + m_{j,r}$$

with  $n$  the number of dMAGs already reconstructed by the approach  $i$ , and  $m_j$  the number of dMAGs reconstructed by approach  $j$ , but located in a de-replication cluster containing at least 1 MAG reconstructed by the approach  $i$ , at the de-replication resolution  $r$ . From the dRep output, we can identify the de-replication cluster each MAG belongs to, and the number of members located in the same de-replication cluster. We can then list, for a given de-replication resolution  $r$ , the set of dMAGs related to one approach  $i$ , searching for each non-unique dMAG (*i.e.* having at least 1 neighbour in its de-replication cluster) of the approach  $j$ , if there is at least one MAG from the approach  $i$ . Thus, to detect shared dMAGs between both approaches, we identified the common elements between the four sets of  $N_{i,r}$  dMAGs.

To detect shared genomes between sets of genomes related to different de-replication resolutions, we should precise that the set of dMAGs at species-level for one approach is completely included in the set of dMAGs at strain-level from this same approach. Thus, we can non-ambiguously identify clustering relationships between two MAGs from different de-replication levels, or find exclusive MAGs reconstructed by one approach, but present at both species and strain levels.
